# Supplementary material for: Sequential sampling of visual objects during sustained attention
Source: PLoS Biol. 2017 Jun 28;15(6):e2001903. doi: 10.1371/journal.pbio.2001903 (PMC5489144; doi:10.1371/journal.pbio.2001903)
Supplement: S6 Data — (XLSX) [file pbio.2001903.s011.xlsx]

## Sheet: S2Fig A left
frequency	alpha_power_MEAN	alpha_power_SEM
3.125	41.3848	5.45298
3.90625	39.227	4.15006
4.6875	36.5425	3.41759
5.46875	35.3874	3.27039
6.25	33.8223	2.90997
7.03125	33.449	3.15799
7.8125	34.927	4.12842
8.59375	39.1554	6.33789
9.375	47.0752	9.51398
10.1562	50.9254	9.08819
10.9375	46.785	5.58838
11.7188	39.7971	3.39403
12.5	34.6424	3.09442
13.2812	29.9072	2.67937
14.0625	26.0608	2.33907
14.8438	24.1034	2.07672
15.625	22.6488	1.90207
16.4062	21.6303	1.802
17.1875	20.9902	1.81678
17.9688	20.4321	1.86743
18.75	19.7705	1.83648
19.5312	19.2157	1.80578
20.3125	18.4364	1.60239
21.0938	17.648	1.38708
21.875	16.6698	1.21654
22.6562	15.8555	1.18241
23.4375	14.8412	1.08277
24.2188	14.1042	1.01079
25	13.4909	1.03945
25.7812	12.8511	1.09597
26.5625	12.2045	1.08401
27.3438	11.6922	1.10943
28.125	11.1691	1.10712
28.9062	10.6028	1.07071
29.6875	10.1413	0.99685
30.4688	9.82096	0.98428

## Sheet: S2Fig A right
channel	alpha_power
'Fp1'	33.5227
'AF7'	36.5805
'F7'	33.997
'Fp2'	38.7114
'AF8'	35.8556
'F8'	32.3249
'F5'	35.3584
'F3'	35.3487
'F1'	38.7604
'Fz'	40.4643
'F2'	38.6587
'F4'	34.3448
'F6'	32.2736
'AF4'	35.8638
'AF3'	37.421
'FT7'	32.0259
'FC5'	31.0476
'FC3'	32.1438
'FC1'	37.5731
'FCz'	41.871
'FC2'	36.2631
'FC4'	31.891
'FC6'	31.3261
'FT8'	32.893
'T8'	34.6222
'C6'	33.2334
'C4'	38.5353
'C2'	37.9707
'Cz'	40.4874
'C1'	36.3238
'C3'	34.0112
'C5'	29.6998
'T7'	30.851
'TP9'	36.4485
'TP7'	32.2404
'CP5'	32.7923
'CP3'	37.3986
'CP1'	41.0944
'CPz'	43.6844
'CP2'	43.5398
'CP4'	43.0371
'CP6'	37.9732
'TP8'	37.6098
'TP10'	36.5888
'P8'	42.8231
'P6'	48.6263
'P4'	52.2802
'P2'	50.0872
'Pz'	49.6198
'P1'	45.0786
'P3'	43.8933
'P5'	39.7607
'P7'	39.0435
'PO9'	43.2477
'PO10'	39.6215
'PO8'	44.0934
'PO4'	47.0928
'POz'	44.1625
'PO3'	45.8641
'PO7'	42.0048
'O1'	40.0216
'Oz'	37.775
'O2'	39.7207

## Sheet: S2Fig B
channel	alpha_power
'Fp1'	-0.889078
'AF7'	-0.309378
'F7'	-0.181716
'Fp2'	0.066041
'AF8'	0.228543
'F8'	0.0222829
'F5'	-0.622622
'F3'	-0.651587
'F1'	-0.80094
'Fz'	-0.66619
'F2'	-0.388511
'F4'	-0.122377
'F6'	-0.0412913
'AF4'	-0.245097
'AF3'	-0.845103
'FT7'	0.0480548
'FC5'	-0.103015
'FC3'	-0.672511
'FC1'	-0.778514
'FCz'	-0.483837
'FC2'	-0.319825
'FC4'	-0.250366
'FC6'	-0.28162
'FT8'	0.0238939
'T8'	-0.276317
'C6'	-0.228467
'C4'	-0.263577
'C2'	-0.181435
'Cz'	-0.433144
'C1'	-0.331356
'C3'	-0.65695
'C5'	-0.317581
'T7'	0.147869
'TP9'	0.667085
'TP7'	0.692477
'CP5'	0.0236085
'CP3'	-0.336871
'CP1'	-0.033001
'CPz'	-0.105847
'CP2'	-0.132814
'CP4'	-0.659627
'CP6'	-1.26209
'TP8'	-1.28421
'TP10'	-0.589453
'P8'	-2.0191
'P6'	-2.86095
'P4'	-2.69254
'P2'	-0.958775
'Pz'	0.0121321
'P1'	0.530481
'P3'	0.730318
'P5'	0.506832
'P7'	0.0356237
'PO9'	0.226259
'PO10'	-0.905643
'PO8'	-2.22679
'PO4'	-2.57168
'POz'	-0.529379
'PO3'	0.662413
'PO7'	0.165582
'O1'	-0.1254
'Oz'	-0.663472
'O2'	-1.94819

## Sheet: S2Fig C top
time frequency	0	0.01	0.02	0.03	0.04	0.05	0.06	0.07	0.08	0.09	0.1	0.11	0.12	0.13	0.14	0.15	0.16	0.17	0.18	0.19	0.2	0.21	0.22	0.23	0.24	0.25	0.26	0.27	0.28	0.29	0.3	0.31	0.32	0.33	0.34	0.35	0.36	0.37	0.38	0.39	0.4	0.41	0.42	0.43	0.44	0.45	0.46	0.47	0.48
1	1.17407e-06	1.64853e-06	2.02604e-06	2.5346e-06	3.09977e-06	2.95612e-06	2.83812e-06	2.68167e-06	2.86757e-06	3.45775e-06	3.56542e-06	3.64596e-06	3.60974e-06	3.30924e-06	3.82145e-06	4.29817e-06	4.85792e-06	4.66937e-06	4.5815e-06	4.41294e-06	4.20886e-06	3.76798e-06	4.52894e-06	4.8793e-06	5.19089e-06	5.51057e-06	5.78987e-06	5.40483e-06	5.15435e-06	4.88746e-06	5.24018e-06	5.46819e-06	5.18143e-06	4.94984e-06	4.93399e-06	4.39949e-06	4.57573e-06	4.82192e-06	5.52527e-06	4.96898e-06	4.52953e-06	3.87797e-06	3.32141e-06	2.78796e-06	3.07787e-06	2.65875e-06	2.48888e-06	2.00956e-06	1.60797e-06
2	2.41007e-06	2.91239e-06	3.59084e-06	4.1572e-06	4.99309e-06	4.93195e-06	5.2469e-06	5.46835e-06	5.88559e-06	6.81272e-06	6.86243e-06	7.52105e-06	7.78276e-06	8.91433e-06	1.05616e-05	1.2166e-05	1.29661e-05	1.29291e-05	1.25844e-05	1.25525e-05	1.32086e-05	1.36392e-05	1.47724e-05	1.51815e-05	1.58235e-05	1.67195e-05	1.74711e-05	1.8101e-05	1.87089e-05	1.89229e-05	1.98679e-05	2.10952e-05	2.11801e-05	2.14404e-05	2.13996e-05	2.13921e-05	2.2111e-05	2.24528e-05	2.29439e-05	2.16877e-05	2.0063e-05	1.85686e-05	1.81573e-05	1.74932e-05	1.77177e-05	1.71593e-05	1.64253e-05	1.54222e-05	1.4472e-05
3	-1.10279e-06	-1.07101e-06	-7.13266e-07	-6.84434e-07	-4.64992e-07	-1.42543e-06	-9.12433e-07	-5.21079e-07	-8.14747e-07	-8.75103e-07	-1.03336e-06	-1.39771e-06	-1.5688e-06	1.16834e-07	2.17644e-06	3.83902e-06	4.36838e-06	5.1973e-06	5.0236e-06	4.77343e-06	5.24759e-06	7.10106e-06	7.8373e-06	8.31727e-06	9.47331e-06	1.10353e-05	1.22022e-05	1.40692e-05	1.6759e-05	1.86833e-05	2.12138e-05	2.37289e-05	2.54858e-05	2.66089e-05	2.71101e-05	2.88799e-05	3.05255e-05	3.1102e-05	3.08962e-05	2.96708e-05	2.76821e-05	2.60345e-05	2.61745e-05	2.60251e-05	2.67731e-05	2.65329e-05	2.65658e-05	2.57627e-05	2.45369e-05
4	-6.23196e-06	-6.56918e-06	-6.92769e-06	-7.48916e-06	-7.72637e-06	-9.09719e-06	-9.88278e-06	-1.08235e-05	-1.20061e-05	-1.31296e-05	-1.40667e-05	-1.73779e-05	-1.92062e-05	-1.98079e-05	-1.97381e-05	-2.05583e-05	-2.12393e-05	-2.0463e-05	-2.06155e-05	-2.21895e-05	-2.39016e-05	-2.31181e-05	-2.40313e-05	-2.36897e-05	-2.24103e-05	-1.92806e-05	-1.62462e-05	-1.29332e-05	-9.63842e-06	-7.37651e-06	-3.83747e-06	-9.60455e-07	2.68859e-06	5.2988e-06	8.17121e-06	1.19211e-05	1.50216e-05	1.70657e-05	1.72369e-05	1.73799e-05	1.63008e-05	1.61934e-05	1.68107e-05	1.73669e-05	1.86978e-05	1.93063e-05	2.05512e-05	2.04753e-05	2.00302e-05
5	-8.65385e-06	-8.92863e-06	-9.6967e-06	-1.03561e-05	-1.08704e-05	-1.20085e-05	-1.43537e-05	-1.66683e-05	-1.75665e-05	-1.80872e-05	-2.01946e-05	-2.54737e-05	-3.02711e-05	-3.45288e-05	-3.85e-05	-4.20526e-05	-4.30851e-05	-4.29594e-05	-4.33092e-05	-4.71589e-05	-5.04965e-05	-5.28233e-05	-5.44713e-05	-5.36763e-05	-5.14237e-05	-4.53673e-05	-4.0449e-05	-3.53766e-05	-3.31043e-05	-3.16427e-05	-2.93443e-05	-2.67613e-05	-2.21368e-05	-1.82702e-05	-1.30134e-05	-8.58264e-06	-4.40451e-06	-1.42697e-06	2.64635e-07	2.1094e-06	2.89022e-06	4.76067e-06	5.97861e-06	7.90534e-06	9.41818e-06	1.11799e-05	1.22235e-05	1.26445e-05	1.23931e-05
6	-1.06253e-05	-1.12743e-05	-1.20001e-05	-1.23223e-05	-1.36237e-05	-1.57534e-05	-1.9223e-05	-2.26673e-05	-2.37176e-05	-2.34124e-05	-2.56551e-05	-3.0766e-05	-3.79352e-05	-4.58416e-05	-5.32463e-05	-5.60149e-05	-5.44958e-05	-5.31005e-05	-5.24611e-05	-5.57459e-05	-5.85518e-05	-6.10593e-05	-6.00151e-05	-5.58793e-05	-4.9918e-05	-4.12566e-05	-3.55413e-05	-3.0283e-05	-2.85138e-05	-2.81511e-05	-2.83047e-05	-2.61445e-05	-2.17223e-05	-1.78649e-05	-1.34023e-05	-1.07675e-05	-8.69268e-06	-7.09875e-06	-4.95297e-06	-2.51864e-06	-2.91029e-07	1.96575e-06	3.15973e-06	5.40665e-06	6.47439e-06	7.96825e-06	8.15534e-06	8.1089e-06	6.67326e-06
7	-1.26491e-05	-1.47097e-05	-1.60281e-05	-1.68661e-05	-1.91398e-05	-2.32179e-05	-2.85619e-05	-3.44338e-05	-3.86007e-05	-4.00055e-05	-4.21146e-05	-4.60901e-05	-5.30987e-05	-6.27703e-05	-7.08052e-05	-7.16154e-05	-6.62331e-05	-6.0127e-05	-5.54524e-05	-5.39655e-05	-5.46946e-05	-5.31634e-05	-4.69847e-05	-3.79352e-05	-2.7986e-05	-1.88324e-05	-1.23697e-05	-7.70613e-06	-4.95311e-06	-5.12623e-06	-7.13591e-06	-7.05853e-06	-4.57504e-06	-1.44875e-06	7.17355e-07	2.29665e-08	-2.50133e-06	-3.9911e-06	-3.29508e-06	-1.74871e-06	-3.12299e-07	2.11597e-07	-4.65228e-07	8.19761e-08	3.69805e-07	3.87383e-07	1.76602e-07	-8.34729e-07	-2.70789e-06
8	-1.38807e-05	-1.74681e-05	-2.05682e-05	-2.29011e-05	-2.67319e-05	-3.34983e-05	-4.14889e-05	-5.11528e-05	-6.01216e-05	-6.65449e-05	-7.0254e-05	-7.23437e-05	-7.80058e-05	-8.60616e-05	-9.14605e-05	-8.97095e-05	-7.85822e-05	-6.64039e-05	-5.66818e-05	-5.01778e-05	-4.7414e-05	-4.08799e-05	-3.05884e-05	-1.80986e-05	-6.68197e-06	6.18572e-07	6.7363e-06	1.16004e-05	1.6094e-05	1.65361e-05	1.31238e-05	1.00435e-05	1.08203e-05	1.4165e-05	1.442e-05	1.01729e-05	3.72324e-06	-7.28605e-07	-1.5457e-06	-2.07534e-06	-3.61212e-06	-6.10157e-06	-9.1904e-06	-9.9883e-06	-1.03512e-05	-1.11609e-05	-1.16398e-05	-1.31688e-05	-1.37524e-05
9	-1.37523e-05	-1.83568e-05	-2.30505e-05	-2.68501e-05	-3.22086e-05	-4.15472e-05	-5.20207e-05	-6.48986e-05	-7.73564e-05	-8.96421e-05	-9.76749e-05	-9.95822e-05	-0.00010321	-0.000107689	-0.000109336	-0.00010345	-8.56567e-05	-6.81169e-05	-5.46005e-05	-4.49313e-05	-3.83639e-05	-2.83428e-05	-1.71208e-05	-4.22219e-06	6.58131e-06	1.2035e-05	1.58302e-05	1.96843e-05	2.53101e-05	2.74893e-05	2.38685e-05	1.86342e-05	1.85761e-05	2.29662e-05	2.31212e-05	1.67283e-05	7.75612e-06	1.50186e-06	6.5215e-08	-2.30064e-06	-6.89883e-06	-1.22799e-05	-1.6765e-05	-1.79433e-05	-1.85298e-05	-1.95078e-05	-2.01292e-05	-2.18169e-05	-2.11469e-05
10	-1.24809e-05	-1.79068e-05	-2.32854e-05	-2.80349e-05	-3.40007e-05	-4.48997e-05	-5.74183e-05	-7.12745e-05	-8.60194e-05	-0.000103011	-0.000115305	-0.000117937	-0.000117804	-0.000119168	-0.000117355	-0.000106559	-8.48887e-05	-6.38563e-05	-4.86096e-05	-3.71851e-05	-2.77617e-05	-1.77719e-05	-8.41892e-06	2.02255e-06	1.13271e-05	1.56596e-05	1.60842e-05	1.82112e-05	2.46457e-05	2.92079e-05	2.62102e-05	2.01926e-05	2.01744e-05	2.5432e-05	2.66215e-05	1.93068e-05	9.38819e-06	2.76991e-06	8.4801e-07	-2.62605e-06	-8.81121e-06	-1.52387e-05	-1.92224e-05	-2.06393e-05	-2.05957e-05	-2.15346e-05	-2.1986e-05	-2.35329e-05	-2.29126e-05
11	-1.22653e-05	-1.82542e-05	-2.38989e-05	-2.88794e-05	-3.56634e-05	-4.81236e-05	-6.2461e-05	-7.62978e-05	-9.28468e-05	-0.000113285	-0.000125604	-0.00012478	-0.000120944	-0.000119949	-0.000112936	-9.51589e-05	-7.14325e-05	-5.14482e-05	-3.77218e-05	-2.6196e-05	-1.56671e-05	-8.10645e-06	-2.27457e-06	5.12265e-06	1.23524e-05	1.39492e-05	1.1329e-05	1.35409e-05	2.1274e-05	2.59633e-05	2.19723e-05	1.69133e-05	1.97203e-05	2.5767e-05	2.50167e-05	1.5655e-05	6.53686e-06	1.76194e-06	-4.18796e-07	-5.45265e-06	-1.20339e-05	-1.69415e-05	-1.84372e-05	-1.91062e-05	-1.83491e-05	-1.87947e-05	-1.9096e-05	-2.06439e-05	-2.01036e-05
12	-1.12973e-05	-1.70581e-05	-2.28184e-05	-2.78455e-05	-3.46565e-05	-4.70412e-05	-6.24943e-05	-7.69273e-05	-9.31773e-05	-0.000114565	-0.000127826	-0.000124212	-0.000116907	-0.000113281	-0.000102929	-8.17755e-05	-5.80229e-05	-4.07428e-05	-2.90657e-05	-1.84367e-05	-8.76499e-06	-2.54744e-06	2.27673e-07	4.43003e-06	1.0282e-05	1.05284e-05	6.45554e-06	7.98605e-06	1.56969e-05	2.03355e-05	1.69218e-05	1.30333e-05	1.7137e-05	2.37091e-05	2.18243e-05	1.20231e-05	3.74422e-06	2.43485e-07	-1.93108e-06	-7.56306e-06	-1.35895e-05	-1.66605e-05	-1.61997e-05	-1.53676e-05	-1.4476e-05	-1.40494e-05	-1.39301e-05	-1.58127e-05	-1.56457e-05
13	-9.01801e-06	-1.4046e-05	-1.95236e-05	-2.46274e-05	-3.06047e-05	-4.16386e-05	-5.83649e-05	-7.34511e-05	-8.74997e-05	-0.000108327	-0.00012256	-0.000116694	-0.000105967	-9.9948e-05	-8.86822e-05	-6.94637e-05	-4.92483e-05	-3.44144e-05	-2.44392e-05	-1.56349e-05	-7.42647e-06	-2.04025e-06	-1.366e-06	6.69487e-07	6.31577e-06	6.98575e-06	2.85775e-06	2.92765e-06	9.3658e-06	1.49623e-05	1.36716e-05	1.03558e-05	1.34685e-05	1.98294e-05	1.88045e-05	1.0597e-05	3.09845e-06	-5.01056e-07	-2.72871e-06	-7.46056e-06	-1.23944e-05	-1.41515e-05	-1.27773e-05	-1.11311e-05	-1.02487e-05	-9.09146e-06	-8.67837e-06	-1.09286e-05	-1.16405e-05
14	-7.71697e-06	-1.20895e-05	-1.67277e-05	-2.15631e-05	-2.73808e-05	-3.83382e-05	-5.69341e-05	-7.22397e-05	-8.46207e-05	-0.000105097	-0.000114661	-0.000101667	-8.88141e-05	-8.08577e-05	-6.67053e-05	-4.98715e-05	-3.55314e-05	-2.51912e-05	-1.84432e-05	-1.24391e-05	-5.84175e-06	-2.38349e-06	-3.61914e-06	-1.45034e-06	4.19372e-06	3.77477e-06	-2.33078e-08	6.18472e-07	6.2787e-06	1.12749e-05	1.02167e-05	7.95419e-06	1.15869e-05	1.67848e-05	1.45518e-05	7.15093e-06	1.59559e-06	-1.33731e-06	-3.68008e-06	-7.53993e-06	-1.128e-05	-1.13268e-05	-8.93051e-06	-7.32454e-06	-6.28978e-06	-4.75158e-06	-4.76801e-06	-7.43055e-06	-8.41478e-06
15	-6.37126e-06	-9.88574e-06	-1.34699e-05	-1.76351e-05	-2.33068e-05	-3.37311e-05	-5.29985e-05	-6.94468e-05	-8.03396e-05	-9.87491e-05	-0.000104538	-8.58447e-05	-7.05812e-05	-6.04731e-05	-4.43409e-05	-3.05888e-05	-2.18479e-05	-1.66568e-05	-1.32837e-05	-9.80486e-06	-5.36828e-06	-2.81623e-06	-4.92028e-06	-2.97502e-06	2.8759e-06	1.89155e-06	-1.45589e-06	-3.50692e-07	4.0288e-06	8.11915e-06	7.60406e-06	6.01502e-06	9.64677e-06	1.36851e-05	1.07386e-05	4.29533e-06	4.82373e-07	-1.66552e-06	-3.89039e-06	-6.92651e-06	-9.60451e-06	-8.93579e-06	-5.9954e-06	-4.43709e-06	-3.42863e-06	-1.7407e-06	-1.96386e-06	-4.8401e-06	-5.8975e-06
16	-4.79063e-06	-7.3508e-06	-9.80143e-06	-1.31344e-05	-1.87606e-05	-2.8081e-05	-4.71389e-05	-6.50645e-05	-7.3294e-05	-8.8215e-05	-9.18693e-05	-7.03534e-05	-5.30619e-05	-4.09676e-05	-2.50989e-05	-1.54202e-05	-1.16404e-05	-1.09468e-05	-9.82909e-06	-8.58361e-06	-5.86508e-06	-3.04235e-06	-5.41509e-06	-3.94334e-06	1.95246e-06	1.12284e-06	-1.62726e-06	-8.96261e-07	1.68444e-06	5.48225e-06	5.96965e-06	4.52774e-06	7.27035e-06	1.03389e-05	7.80833e-06	2.67544e-06	3.78398e-08	-1.5321e-06	-3.37758e-06	-5.42433e-06	-7.52218e-06	-7.01735e-06	-4.03606e-06	-2.54587e-06	-1.7128e-06	-9.5722e-09	-2.68776e-07	-2.89628e-06	-4.14399e-06
17	-3.77535e-06	-5.55143e-06	-6.89565e-06	-9.57183e-06	-1.56591e-05	-2.4825e-05	-4.41164e-05	-6.15482e-05	-6.64937e-05	-7.81606e-05	-7.69221e-05	-5.27464e-05	-3.57275e-05	-2.20865e-05	-7.59859e-06	-2.43412e-06	-3.58724e-06	-6.72979e-06	-6.93699e-06	-7.62253e-06	-5.39393e-06	-2.78289e-06	-5.6e-06	-3.42577e-06	1.91975e-06	4.74532e-07	-1.46358e-06	-9.16119e-07	3.44132e-07	3.91064e-06	4.45883e-06	3.36977e-06	5.67478e-06	7.42204e-06	4.8028e-06	7.73928e-07	-5.62447e-07	-1.50579e-06	-2.92678e-06	-4.09155e-06	-5.93799e-06	-5.30846e-06	-2.40148e-06	-1.38614e-06	-5.91738e-07	9.37117e-07	2.6933e-07	-1.81149e-06	-3.03173e-06
18	-2.94185e-06	-4.08794e-06	-4.68617e-06	-6.46922e-06	-1.20931e-05	-2.09496e-05	-3.84167e-05	-5.53467e-05	-5.95431e-05	-6.67759e-05	-6.37261e-05	-4.06808e-05	-2.30879e-05	-9.03876e-06	4.38381e-06	7.36784e-06	3.20591e-06	-2.73106e-06	-4.86742e-06	-6.37056e-06	-5.02115e-06	-2.4895e-06	-4.78903e-06	-3.06808e-06	1.58265e-06	5.54955e-07	-1.06824e-06	-7.70215e-07	-4.53403e-07	2.28876e-06	3.25714e-06	2.58578e-06	4.22455e-06	5.0663e-06	2.76405e-06	-3.95492e-07	-1.15442e-06	-1.45419e-06	-2.36159e-06	-2.92277e-06	-4.35738e-06	-4.1036e-06	-1.66904e-06	-7.36858e-07	-1.10579e-07	1.14798e-06	4.58375e-07	-1.11122e-06	-2.14627e-06
19	-2.19139e-06	-2.92256e-06	-3.09569e-06	-3.66613e-06	-7.9768e-06	-1.58684e-05	-2.94087e-05	-4.74535e-05	-5.22066e-05	-5.48144e-05	-5.46037e-05	-3.48485e-05	-1.57588e-05	-2.71812e-06	1.10838e-05	1.40037e-05	8.92254e-06	9.13907e-07	-3.49481e-06	-4.84121e-06	-5.0966e-06	-2.06428e-06	-3.35459e-06	-3.38737e-06	9.48585e-07	1.28277e-06	-7.04942e-07	-4.77383e-07	-1.05989e-06	5.64299e-07	2.46609e-06	2.02942e-06	2.90065e-06	3.48171e-06	1.8575e-06	-8.19982e-07	-1.6416e-06	-1.25509e-06	-1.77321e-06	-1.87404e-06	-2.85425e-06	-3.4573e-06	-1.67382e-06	-4.06853e-07	-1.64079e-07	9.82353e-07	6.1863e-07	-5.59622e-07	-1.44193e-06
20	-1.84542e-06	-2.1653e-06	-1.94659e-06	-2.17414e-06	-6.75056e-06	-1.41537e-05	-2.68023e-05	-4.29442e-05	-4.42926e-05	-4.53329e-05	-4.3089e-05	-2.36809e-05	-7.46286e-06	4.9556e-06	1.67771e-05	1.65862e-05	1.02929e-05	1.08712e-06	-2.76428e-06	-4.07886e-06	-4.10449e-06	-1.29177e-06	-2.7791e-06	-2.56939e-06	1.34247e-06	1.14141e-06	-4.16823e-07	-3.32289e-07	-1.4802e-06	1.74288e-07	1.92451e-06	1.68045e-06	2.24104e-06	2.23275e-06	6.70573e-07	-1.47684e-06	-1.7003e-06	-1.04487e-06	-1.29037e-06	-1.10188e-06	-2.12342e-06	-2.72977e-06	-1.17988e-06	-2.59009e-07	-9.25883e-08	8.33811e-07	3.20162e-07	-4.00187e-07	-1.03312e-06
21	-1.70186e-06	-1.74721e-06	-1.20576e-06	-1.53305e-06	-6.4418e-06	-1.37546e-05	-2.61005e-05	-3.89403e-05	-3.70036e-05	-3.72321e-05	-3.14684e-05	-1.26351e-05	-3.20547e-07	1.12175e-05	2.02985e-05	1.71254e-05	9.92363e-06	4.9552e-07	-2.2433e-06	-3.54066e-06	-2.76747e-06	-5.37906e-07	-2.51089e-06	-1.39677e-06	1.81912e-06	7.44728e-07	-1.80573e-07	-2.52545e-07	-1.56292e-06	2.19863e-07	1.45567e-06	1.47413e-06	1.97689e-06	1.30981e-06	-3.82928e-07	-1.96586e-06	-1.61313e-06	-8.74017e-07	-9.01807e-07	-5.36502e-07	-1.67805e-06	-1.96162e-06	-5.83535e-07	-1.38274e-07	1.43806e-08	6.61936e-07	-1.31425e-07	-3.8333e-07	-6.88979e-07
22	-1.52809e-06	-1.49754e-06	-8.26114e-07	-8.86072e-07	-5.01883e-06	-1.18085e-05	-2.17775e-05	-3.32614e-05	-3.08203e-05	-2.94338e-05	-2.43327e-05	-8.13107e-06	2.57463e-06	1.23438e-05	2.05321e-05	1.7195e-05	1.03931e-05	1.1798e-06	-1.6572e-06	-2.67707e-06	-2.11844e-06	-3.36209e-08	-1.91316e-06	-1.11049e-06	1.68104e-06	8.56696e-07	-3.79514e-08	-8.08443e-08	-1.51801e-06	-1.84757e-07	1.12628e-06	1.33894e-06	1.69498e-06	8.56067e-07	-6.22841e-07	-1.89411e-06	-1.58892e-06	-6.59043e-07	-5.84496e-07	-6.71518e-08	-1.10824e-06	-1.49787e-06	-4.33153e-07	-2.06817e-08	-9.42687e-08	4.42528e-07	-2.99254e-07	-1.95855e-07	-2.95664e-07
23	-1.42503e-06	-1.33815e-06	-6.10501e-07	-5.43661e-07	-4.23305e-06	-1.03518e-05	-1.8529e-05	-2.8315e-05	-2.50715e-05	-2.29707e-05	-1.8181e-05	-4.29031e-06	4.44895e-06	1.27679e-05	1.96249e-05	1.59965e-05	9.80373e-06	1.18337e-06	-1.1155e-06	-2.01979e-06	-1.41735e-06	3.62141e-07	-1.53386e-06	-8.36942e-07	1.60506e-06	8.12734e-07	7.62094e-08	-2.8177e-08	-1.48445e-06	-3.38734e-07	8.94247e-07	1.2836e-06	1.49748e-06	5.4059e-07	-7.40105e-07	-1.72764e-06	-1.40106e-06	-4.33815e-07	-3.08156e-07	2.62827e-07	-7.61008e-07	-1.13943e-06	-2.55323e-07	6.62439e-08	-1.41902e-07	2.53632e-07	-4.184e-07	2.39491e-08	6.36848e-08
24	-1.25667e-06	-1.37158e-06	-6.41228e-07	-4.02004e-07	-2.7075e-06	-8.2643e-06	-1.41804e-05	-2.29672e-05	-2.13021e-05	-1.80586e-05	-1.444e-05	-3.63667e-06	4.64578e-06	1.09461e-05	1.75682e-05	1.53737e-05	1.00492e-05	2.51634e-06	-6.97376e-07	-1.1698e-06	-1.26336e-06	7.41096e-07	-9.77128e-07	-8.59501e-07	1.11347e-06	1.08753e-06	6.95919e-08	1.57376e-07	-1.16531e-06	-7.42261e-07	5.72041e-07	1.03067e-06	1.49692e-06	5.70172e-07	-5.98825e-07	-1.39751e-06	-1.36359e-06	-3.41218e-07	-1.76617e-07	4.30351e-07	-3.04617e-07	-8.51201e-07	-2.89629e-07	2.46235e-07	-1.85009e-07	1.59031e-07	-4.46395e-07	4.18715e-08	4.00779e-07
25	-1.12243e-06	-1.41576e-06	-7.23465e-07	-3.36594e-07	-1.44374e-06	-6.26739e-06	-1.02117e-05	-1.81238e-05	-1.8127e-05	-1.41597e-05	-1.18834e-05	-3.90405e-06	4.01841e-06	8.67437e-06	1.51607e-05	1.44873e-05	1.00727e-05	3.6891e-06	-3.19269e-07	-5.27129e-07	-1.10647e-06	9.19682e-07	-5.52475e-07	-9.27775e-07	6.48988e-07	1.26174e-06	6.8661e-08	2.82048e-07	-8.65109e-07	-1.0862e-06	2.70903e-07	8.28787e-07	1.49348e-06	6.46306e-07	-4.17026e-07	-1.05887e-06	-1.26384e-06	-2.54938e-07	-7.96129e-08	4.91919e-07	6.41701e-09	-6.33843e-07	-3.22129e-07	3.3989e-07	-2.24267e-07	9.33852e-08	-3.50306e-07	1.44052e-07	6.91545e-07
26	-1.10191e-06	-1.36924e-06	-6.36968e-07	-3.68429e-07	-1.56969e-06	-5.82777e-06	-8.83562e-06	-1.54193e-05	-1.4004e-05	-1.068e-05	-8.21687e-06	-1.34659e-06	4.42685e-06	8.51252e-06	1.36215e-05	1.21097e-05	8.35109e-06	2.68817e-06	2.58683e-08	-4.18745e-07	-4.97861e-07	1.11973e-06	-7.18652e-07	-6.31288e-07	7.50707e-07	9.37788e-07	9.87798e-08	1.78942e-07	-9.02966e-07	-9.36242e-07	1.53953e-07	8.26423e-07	1.41801e-06	4.43864e-07	-5.50336e-07	-9.20208e-07	-9.53195e-07	-5.03838e-09	5.73221e-08	5.99076e-07	-1.16633e-07	-4.73625e-07	-1.06446e-07	3.56275e-07	-2.42224e-07	4.73463e-08	-3.46295e-07	5.19737e-07	9.64133e-07
27	-1.10142e-06	-1.29596e-06	-5.90764e-07	-4.20407e-07	-1.77925e-06	-5.34247e-06	-7.76147e-06	-1.2954e-05	-1.06523e-05	-7.79227e-06	-5.3874e-06	4.87797e-07	4.678e-06	8.21539e-06	1.20262e-05	9.92242e-06	6.64006e-06	1.86198e-06	2.61209e-07	-3.32511e-07	1.86545e-08	1.10948e-06	-7.78971e-07	-4.22126e-07	8.43047e-07	6.58297e-07	9.5104e-08	4.51488e-08	-9.31034e-07	-7.79981e-07	8.75591e-08	8.67455e-07	1.26419e-06	2.47233e-07	-6.21836e-07	-8.13169e-07	-6.53381e-07	1.7864e-07	1.76166e-07	5.94361e-07	-2.3131e-07	-3.76961e-07	8.13657e-08	3.38504e-07	-2.26199e-07	-1.90547e-09	-2.07629e-07	8.68798e-07	1.19388e-06
28	-1.12285e-06	-1.18624e-06	-5.56823e-07	-4.76055e-07	-2.05594e-06	-4.70034e-06	-6.7967e-06	-1.05876e-05	-7.92649e-06	-5.47195e-06	-3.35002e-06	1.59944e-06	4.49653e-06	7.76046e-06	1.04122e-05	7.98205e-06	5.12119e-06	1.28885e-06	4.74886e-07	-4.00791e-07	6.09943e-07	8.42152e-07	-7.86373e-07	-2.35794e-07	9.55839e-07	3.09897e-07	1.58468e-07	-1.31047e-07	-9.1052e-07	-6.30917e-07	-7.32298e-09	9.98992e-07	1.04568e-06	8.50704e-08	-6.71793e-07	-7.14566e-07	-3.25005e-07	3.03593e-07	2.83968e-07	5.00334e-07	-3.84129e-07	-2.80974e-07	2.85625e-07	2.24615e-07	-1.93518e-07	-5.48563e-08	8.0405e-08	1.25031e-06	1.36441e-06
29	-9.76965e-07	-1.19093e-06	-5.53133e-07	-5.29172e-07	-1.67056e-06	-4.04204e-06	-4.92461e-06	-8.72019e-06	-6.18519e-06	-4.01624e-06	-2.28109e-06	1.61137e-06	3.75576e-06	6.59672e-06	9.10079e-06	6.80437e-06	4.48707e-06	1.18417e-06	6.8281e-07	-3.52697e-07	6.16629e-07	1.12413e-06	-8.58121e-07	-1.42722e-07	8.87908e-07	2.43249e-07	1.19648e-07	-1.06938e-07	-7.73558e-07	-6.49213e-07	-1.62562e-07	7.8465e-07	1.10062e-06	1.66428e-07	-7.19871e-07	-6.26028e-07	-2.5883e-07	4.58239e-07	3.04456e-07	5.37611e-07	-4.83492e-07	-2.62327e-07	3.12246e-07	3.24367e-07	-2.48456e-07	2.27787e-09	1.04796e-07	1.49262e-06	1.58396e-06
30	-5.8282e-07	-9.3124e-07	-4.60522e-07	-4.28562e-07	-7.6532e-07	-2.5691e-06	-2.42961e-06	-5.52902e-06	-4.28549e-06	-2.64382e-06	-1.51811e-06	5.5255e-07	2.25042e-06	4.00506e-06	6.10026e-06	4.94394e-06	3.41138e-06	1.20055e-06	5.94148e-07	-1.03453e-07	1.82511e-07	1.1522e-06	-5.91832e-07	-1.27164e-07	4.73197e-07	3.40509e-07	7.68911e-09	1.80594e-08	-4.38913e-07	-5.75314e-07	-2.25263e-07	3.12986e-07	9.53955e-07	2.65006e-07	-5.06623e-07	-4.26445e-07	-2.72955e-07	3.93467e-07	2.21559e-07	4.35064e-07	-3.14454e-07	-2.30683e-07	1.42033e-07	3.80264e-07	-2.12226e-07	4.76069e-08	6.23814e-09	1.11284e-06	1.31676e-06
[truncated: 32 more columns]

## Sheet: S2Fig C bottom
channel	alpha_power
'Fp1'	2.61936e-06
'AF7'	-6.14792e-06
'F7'	-2.30352e-05
'Fp2'	-8.18187e-06
'AF8'	-7.10581e-06
'F8'	-3.07029e-05
'F5'	-6.61768e-06
'F3'	-1.87173e-05
'F1'	2.56451e-05
'Fz'	8.05587e-06
'F2'	5.01009e-06
'F4'	4.98495e-06
'F6'	-6.1542e-06
'AF4'	-7.45698e-06
'AF3'	-1.28833e-05
'FT7'	-4.90265e-06
'FC5'	2.31897e-06
'FC3'	-1.04819e-05
'FC1'	4.78295e-06
'FCz'	1.87601e-05
'FC2'	1.80168e-05
'FC4'	1.77753e-05
'FC6'	2.23139e-05
'FT8'	1.14549e-05
'T8'	1.1378e-05
'C6'	2.90703e-05
'C4'	1.26266e-05
'C2'	2.16825e-06
'Cz'	-2.92533e-06
'C1'	5.89495e-06
'C3'	6.45629e-06
'C5'	2.43598e-05
'T7'	5.60503e-06
'TP9'	8.62589e-06
'TP7'	2.5146e-05
'CP5'	-5.83659e-06
'CP3'	-6.71127e-06
'CP1'	-1.81548e-05
'CPz'	-2.88642e-05
'CP2'	-4.84532e-05
'CP4'	-3.00386e-05
'CP6'	2.86366e-05
'TP8'	5.44805e-06
'TP10'	-1.07856e-05
'P8'	3.33279e-05
'P6'	6.8288e-05
'P4'	4.04828e-06
'P2'	-6.5545e-05
'Pz'	-9.04215e-05
'P1'	-3.46669e-05
'P3'	-8.34132e-07
'P5'	-1.43028e-06
'P7'	5.06115e-06
'PO8'	5.2834e-05
'PO4'	2.18019e-05
'POz'	-1.45793e-05
'PO3'	1.74421e-06
'PO7'	1.89143e-05
'O1'	7.31373e-06
'Oz'	8.51096e-06
'O2'	3.63222e-05

## Sheet: S2Fig D top
time frequency	0	0.01	0.02	0.03	0.04	0.05	0.06	0.07	0.08	0.09	0.1	0.11	0.12	0.13	0.14	0.15	0.16	0.17	0.18	0.19	0.2	0.21	0.22	0.23	0.24	0.25	0.26	0.27	0.28	0.29	0.3	0.31	0.32	0.33	0.34	0.35	0.36	0.37	0.38	0.39	0.4	0.41	0.42	0.43	0.44	0.45	0.46	0.47	0.48
1	-1.20603e-06	-8.76146e-07	-2.65991e-07	-2.22764e-07	-2.32496e-07	-8.84373e-08	-3.93243e-07	-6.52176e-07	-4.17139e-07	-2.32989e-08	5.09815e-07	3.03445e-07	1.71708e-07	1.24736e-07	4.1399e-08	2.90622e-07	6.06169e-07	8.64531e-07	6.08167e-07	-1.80987e-07	-4.37523e-07	8.95583e-08	3.6005e-07	6.39892e-07	7.45949e-07	8.06908e-07	7.22319e-07	3.28376e-07	-2.24436e-07	-3.59566e-07	-2.99305e-07	-1.2251e-07	-2.70293e-07	-7.11323e-07	-1.30518e-06	-1.69974e-06	-1.6501e-06	-1.28309e-06	-1.39225e-06	-1.44696e-06	-2.00528e-06	-2.61804e-06	-2.99138e-06	-3.05561e-06	-2.94316e-06	-2.55741e-06	-2.62658e-06	-2.30972e-06	-2.45151e-06
2	2.02216e-06	2.66706e-06	3.9323e-06	4.35882e-06	4.57896e-06	4.66384e-06	4.56633e-06	4.84819e-06	5.82236e-06	7.02171e-06	8.36785e-06	8.69881e-06	8.90547e-06	9.08795e-06	8.69117e-06	9.24192e-06	9.87264e-06	1.02973e-05	1.01813e-05	9.828e-06	9.42607e-06	9.51457e-06	9.62722e-06	9.79855e-06	9.90556e-06	9.58047e-06	9.15304e-06	8.28623e-06	7.2447e-06	6.886e-06	6.68039e-06	6.61346e-06	6.03592e-06	5.09017e-06	4.18805e-06	3.27014e-06	2.7283e-06	2.49136e-06	1.74702e-06	9.51941e-07	3.24597e-07	-3.9793e-07	-6.51218e-07	-1.01226e-06	-1.36483e-06	-1.30813e-06	-1.87893e-06	-1.70749e-06	-1.9263e-06
3	4.85227e-06	6.3548e-06	8.16666e-06	9.36067e-06	1.06688e-05	1.15291e-05	1.24787e-05	1.3673e-05	1.52764e-05	1.68185e-05	1.90567e-05	2.08602e-05	2.21368e-05	2.20581e-05	2.11319e-05	2.21404e-05	2.35265e-05	2.44604e-05	2.39121e-05	2.27811e-05	2.10139e-05	1.96169e-05	1.96714e-05	1.94134e-05	1.81524e-05	1.6299e-05	1.45818e-05	1.32707e-05	1.17261e-05	1.08187e-05	1.00792e-05	9.61631e-06	8.39389e-06	7.45479e-06	6.45444e-06	5.21994e-06	4.04501e-06	3.02293e-06	1.86281e-06	8.78527e-07	1.96042e-07	-2.29873e-07	2.83095e-07	-1.2096e-07	-3.58672e-07	-5.55742e-07	-1.31705e-06	-1.7488e-06	-2.27234e-06
4	4.13975e-06	6.02104e-06	7.83047e-06	9.64102e-06	1.22125e-05	1.48366e-05	1.71966e-05	1.92833e-05	2.1265e-05	2.2735e-05	2.56256e-05	2.87192e-05	3.19881e-05	3.29015e-05	3.23922e-05	3.33129e-05	3.47941e-05	3.57667e-05	3.3519e-05	2.97593e-05	2.63087e-05	2.40969e-05	2.32938e-05	2.10547e-05	1.72445e-05	1.31214e-05	9.5076e-06	6.71818e-06	4.06545e-06	2.34796e-06	8.44047e-07	4.02714e-07	-7.37479e-07	-6.66465e-07	-1.36786e-06	-2.67171e-06	-4.11806e-06	-5.47472e-06	-6.45517e-06	-6.93143e-06	-7.17158e-06	-6.73673e-06	-5.54657e-06	-5.34865e-06	-5.05708e-06	-4.84717e-06	-5.11455e-06	-5.83211e-06	-6.4164e-06
5	9.20952e-07	2.05615e-06	3.50297e-06	5.84287e-06	8.70564e-06	1.21686e-05	1.47316e-05	1.76842e-05	2.03103e-05	2.20544e-05	2.46576e-05	2.82358e-05	3.39053e-05	3.74055e-05	3.92502e-05	4.01364e-05	4.07429e-05	4.0554e-05	3.66968e-05	3.1701e-05	2.6904e-05	2.43615e-05	2.15537e-05	1.6934e-05	1.19227e-05	6.15928e-06	1.08064e-06	-4.46589e-06	-8.12693e-06	-9.78003e-06	-1.097e-05	-1.04069e-05	-1.08573e-05	-9.99543e-06	-1.05789e-05	-1.16593e-05	-1.28307e-05	-1.40635e-05	-1.43759e-05	-1.45256e-05	-1.36887e-05	-1.21075e-05	-1.03123e-05	-8.66508e-06	-7.91329e-06	-6.72586e-06	-6.68975e-06	-6.85641e-06	-7.12906e-06
6	-3.46356e-06	-3.45564e-06	-2.85702e-06	-1.18222e-06	4.01176e-07	2.49162e-06	4.04811e-06	6.37304e-06	8.07504e-06	9.41884e-06	1.07011e-05	1.36713e-05	1.98264e-05	2.49817e-05	2.96072e-05	3.18777e-05	3.14864e-05	2.97935e-05	2.68962e-05	2.4038e-05	2.02819e-05	1.78907e-05	1.41113e-05	9.39239e-06	5.62471e-06	2.88896e-07	-5.06223e-06	-1.12664e-05	-1.47478e-05	-1.54933e-05	-1.48908e-05	-1.31909e-05	-1.33335e-05	-1.33374e-05	-1.45338e-05	-1.5275e-05	-1.54266e-05	-1.54264e-05	-1.47107e-05	-1.43804e-05	-1.25059e-05	-9.86898e-06	-7.11409e-06	-3.78283e-06	-1.81578e-06	7.15404e-08	2.70995e-07	5.87665e-07	7.0581e-07
7	-8.10414e-06	-9.49294e-06	-1.05416e-05	-1.10076e-05	-1.20918e-05	-1.34014e-05	-1.45283e-05	-1.52251e-05	-1.63162e-05	-1.74569e-05	-1.8424e-05	-1.84468e-05	-1.54997e-05	-1.02951e-05	-3.93417e-06	1.5318e-06	2.34817e-06	1.32084e-06	2.38429e-06	4.99757e-06	7.97535e-06	9.55456e-06	7.74798e-06	5.2619e-06	4.85725e-06	4.12885e-06	1.13959e-06	-3.61765e-06	-7.79894e-06	-8.77364e-06	-6.71185e-06	-4.59185e-06	-5.10414e-06	-7.77713e-06	-1.06026e-05	-1.14091e-05	-1.03248e-05	-8.59682e-06	-7.32568e-06	-6.27928e-06	-4.13133e-06	-7.79295e-07	3.10013e-06	7.31606e-06	1.05037e-05	1.22047e-05	1.28071e-05	1.2721e-05	1.23565e-05
8	-1.25321e-05	-1.57015e-05	-1.86236e-05	-2.17428e-05	-2.65002e-05	-3.22126e-05	-3.79431e-05	-4.26991e-05	-4.75851e-05	-5.28159e-05	-5.61026e-05	-5.9936e-05	-6.15254e-05	-5.68017e-05	-4.77892e-05	-3.74897e-05	-3.31734e-05	-3.08525e-05	-2.39575e-05	-1.20689e-05	1.45506e-06	8.85247e-06	1.02967e-05	1.11568e-05	1.57251e-05	2.14669e-05	2.14513e-05	1.62124e-05	9.98235e-06	8.61161e-06	1.09794e-05	1.25913e-05	1.01663e-05	3.98306e-06	-2.37868e-07	-1.11622e-06	9.35037e-07	3.22863e-06	4.25747e-06	6.13712e-06	8.24732e-06	1.21134e-05	1.64582e-05	1.98571e-05	2.28617e-05	2.36972e-05	2.40331e-05	2.301e-05	2.1178e-05
9	-1.47354e-05	-1.96312e-05	-2.42521e-05	-2.93792e-05	-3.73501e-05	-4.7293e-05	-5.76992e-05	-6.63916e-05	-7.57313e-05	-8.56164e-05	-9.16405e-05	-9.70143e-05	-0.000100726	-9.76524e-05	-8.65864e-05	-7.05932e-05	-6.07269e-05	-5.42685e-05	-4.2868e-05	-2.24996e-05	4.39489e-07	1.32466e-05	1.71475e-05	2.00928e-05	2.83163e-05	3.82227e-05	4.02989e-05	3.38856e-05	2.57324e-05	2.41057e-05	2.63711e-05	2.72051e-05	2.25975e-05	1.3752e-05	8.8148e-06	8.03471e-06	1.05537e-05	1.27203e-05	1.33323e-05	1.57653e-05	1.84892e-05	2.28095e-05	2.66812e-05	2.84912e-05	2.99548e-05	2.96932e-05	2.90706e-05	2.72842e-05	2.45212e-05
10	-1.43138e-05	-2.04137e-05	-2.62458e-05	-3.21799e-05	-4.20311e-05	-5.55754e-05	-6.93502e-05	-8.09889e-05	-9.48419e-05	-0.000109298	-0.000117447	-0.000120965	-0.00012474	-0.000123406	-0.000109953	-8.82926e-05	-7.26744e-05	-6.39564e-05	-5.03095e-05	-2.61812e-05	3.05916e-07	1.60177e-05	2.01556e-05	2.31277e-05	3.19989e-05	4.28738e-05	4.59807e-05	3.94345e-05	3.09924e-05	2.88548e-05	3.10723e-05	3.12218e-05	2.57959e-05	1.67385e-05	1.14085e-05	1.11596e-05	1.36403e-05	1.56923e-05	1.6686e-05	1.94276e-05	2.30963e-05	2.70756e-05	2.98075e-05	3.03358e-05	2.96746e-05	2.85205e-05	2.72152e-05	2.54381e-05	2.27395e-05
11	-1.38768e-05	-2.04675e-05	-2.64516e-05	-3.26289e-05	-4.41443e-05	-6.05208e-05	-7.57045e-05	-8.84792e-05	-0.000106492	-0.000124688	-0.000131434	-0.000130942	-0.000133953	-0.000130583	-0.000109274	-8.27884e-05	-6.724e-05	-5.87685e-05	-4.19684e-05	-1.67302e-05	6.06959e-06	1.69838e-05	1.80383e-05	2.09803e-05	2.98107e-05	3.84791e-05	3.87833e-05	3.12868e-05	2.49908e-05	2.48459e-05	2.70356e-05	2.55317e-05	1.93222e-05	1.17887e-05	8.15097e-06	9.46762e-06	1.21396e-05	1.38839e-05	1.60185e-05	2.00818e-05	2.43392e-05	2.70734e-05	2.80752e-05	2.6981e-05	2.41976e-05	2.20056e-05	2.05724e-05	1.92111e-05	1.71946e-05
12	-1.20472e-05	-1.81267e-05	-2.37081e-05	-2.92251e-05	-3.98113e-05	-5.61248e-05	-7.18716e-05	-8.44253e-05	-0.000103016	-0.000124388	-0.000132537	-0.000129086	-0.00012927	-0.000124947	-9.95942e-05	-6.92403e-05	-5.47274e-05	-4.7251e-05	-3.03191e-05	-7.90487e-06	9.79929e-06	1.57701e-05	1.43904e-05	1.62261e-05	2.33222e-05	2.92268e-05	2.75014e-05	2.00911e-05	1.54756e-05	1.70661e-05	1.93207e-05	1.72518e-05	1.14359e-05	5.37513e-06	3.17569e-06	4.87833e-06	7.88641e-06	9.89994e-06	1.26375e-05	1.8099e-05	2.28051e-05	2.46791e-05	2.45387e-05	2.23031e-05	1.82203e-05	1.45176e-05	1.2908e-05	1.21019e-05	1.09549e-05
13	-8.86238e-06	-1.37601e-05	-1.87432e-05	-2.28479e-05	-2.99614e-05	-4.40084e-05	-5.96954e-05	-7.06977e-05	-8.72451e-05	-0.000111662	-0.0001229	-0.000116971	-0.000114744	-0.000111329	-8.62614e-05	-5.51588e-05	-4.1438e-05	-3.50465e-05	-2.16945e-05	-5.17228e-06	8.66015e-06	1.3613e-05	1.17329e-05	1.1745e-05	1.56248e-05	1.9397e-05	1.81306e-05	1.21288e-05	8.08648e-06	9.69147e-06	1.20185e-05	1.06071e-05	6.45255e-06	1.46485e-06	-1.2826e-06	-1.89807e-07	2.9717e-06	5.5138e-06	8.66013e-06	1.46972e-05	1.94605e-05	2.07457e-05	2.02838e-05	1.77133e-05	1.29682e-05	8.2288e-06	6.58578e-06	6.49364e-06	6.08252e-06
14	-7.05132e-06	-1.08829e-05	-1.48255e-05	-1.76565e-05	-2.24864e-05	-3.45592e-05	-4.8319e-05	-5.64886e-05	-7.22093e-05	-9.82575e-05	-0.000107174	-9.81588e-05	-9.67332e-05	-9.08864e-05	-6.17064e-05	-3.41871e-05	-2.61324e-05	-2.07156e-05	-9.87663e-06	9.07735e-07	1.01777e-05	1.30947e-05	1.04764e-05	1.03663e-05	1.24062e-05	1.33231e-05	1.1065e-05	5.53165e-06	2.6694e-06	5.19201e-06	7.15242e-06	5.48304e-06	2.41859e-06	-1.71314e-06	-4.85599e-06	-3.63841e-06	-4.38637e-07	2.07133e-06	6.18337e-06	1.26932e-05	1.66532e-05	1.67796e-05	1.59344e-05	1.29254e-05	7.51153e-06	2.9139e-06	1.87168e-06	2.4215e-06	2.58574e-06
15	-5.59708e-06	-8.46392e-06	-1.13512e-05	-1.3284e-05	-1.63674e-05	-2.53539e-05	-3.64495e-05	-4.20516e-05	-5.53397e-05	-8.06271e-05	-8.92681e-05	-7.93551e-05	-7.81142e-05	-7.10313e-05	-4.01433e-05	-1.55701e-05	-1.22153e-05	-7.99644e-06	1.59319e-07	5.68955e-06	1.16366e-05	1.33457e-05	1.06961e-05	1.09546e-05	1.18403e-05	1.02853e-05	7.08253e-06	1.69646e-06	-6.2395e-07	2.49363e-06	4.18388e-06	2.60579e-06	3.14904e-07	-3.23163e-06	-6.6005e-06	-6.15156e-06	-3.13887e-06	-7.02536e-07	3.69463e-06	1.04341e-05	1.38075e-05	1.32442e-05	1.21441e-05	9.15938e-06	3.76385e-06	-4.86193e-07	-1.17625e-06	-1.92547e-07	2.59159e-07
16	-4.11245e-06	-6.04982e-06	-8.14555e-06	-9.6158e-06	-1.09057e-05	-1.62939e-05	-2.49988e-05	-2.85343e-05	-3.76846e-05	-6.13469e-05	-7.21217e-05	-6.29859e-05	-6.0606e-05	-5.41515e-05	-2.47178e-05	-2.47823e-06	-1.47639e-06	1.30688e-06	5.89755e-06	7.51324e-06	1.15796e-05	1.34682e-05	1.15374e-05	1.19921e-05	1.18192e-05	8.6569e-06	5.34487e-06	1.54832e-07	-2.18931e-06	9.16941e-07	2.55565e-06	1.64127e-06	-1.69007e-07	-3.22517e-06	-7.11391e-06	-7.90405e-06	-5.0889e-06	-2.92843e-06	1.28614e-06	7.73746e-06	1.07873e-05	1.00869e-05	9.04907e-06	6.53486e-06	1.70736e-06	-2.11664e-06	-2.73048e-06	-1.4809e-06	-9.61816e-07
17	-3.17328e-06	-4.35817e-06	-5.90879e-06	-7.11122e-06	-7.33563e-06	-1.04164e-05	-1.68621e-05	-1.81416e-05	-2.48555e-05	-4.70931e-05	-5.67766e-05	-4.82624e-05	-4.57032e-05	-3.78129e-05	-8.79698e-06	8.43097e-06	6.84628e-06	8.44767e-06	9.39659e-06	8.75341e-06	1.13194e-05	1.31131e-05	1.19804e-05	1.29366e-05	1.17501e-05	7.39319e-06	4.07611e-06	-1.00459e-06	-2.6397e-06	5.43008e-07	1.85539e-06	1.38437e-06	-3.7681e-07	-2.99342e-06	-7.39524e-06	-8.52951e-06	-5.86763e-06	-4.27889e-06	1.70359e-07	5.89709e-06	8.16875e-06	7.23465e-06	6.40331e-06	4.15754e-06	-8.63038e-08	-2.97902e-06	-3.21934e-06	-1.74263e-06	-1.29787e-06
18	-2.40178e-06	-3.05402e-06	-4.07856e-06	-5.13201e-06	-5.04206e-06	-6.36898e-06	-1.04886e-05	-1.08412e-05	-1.48136e-05	-3.28497e-05	-4.30689e-05	-3.74975e-05	-3.4297e-05	-2.62306e-05	-5.62274e-07	1.50867e-05	1.34844e-05	1.33486e-05	1.17888e-05	9.28471e-06	1.03344e-05	1.19552e-05	1.18539e-05	1.30225e-05	1.18448e-05	7.12526e-06	3.57142e-06	-9.3425e-07	-2.54764e-06	1.63526e-07	1.49908e-06	1.46517e-06	3.52884e-08	-2.28355e-06	-6.48326e-06	-8.41776e-06	-6.46913e-06	-5.15996e-06	-1.22641e-06	3.81817e-06	5.82704e-06	5.10477e-06	4.3508e-06	2.64458e-06	-8.06408e-07	-3.06336e-06	-3.1996e-06	-1.76873e-06	-1.15198e-06
19	-1.70718e-06	-2.03206e-06	-2.4593e-06	-3.56441e-06	-3.62677e-06	-3.45889e-06	-5.52649e-06	-6.34967e-06	-6.13119e-06	-1.87059e-05	-3.20982e-05	-3.06574e-05	-2.6211e-05	-2.07168e-05	1.33172e-07	1.86183e-05	1.81616e-05	1.62371e-05	1.3608e-05	9.1773e-06	8.59761e-06	1.03982e-05	1.11299e-05	1.23016e-05	1.23049e-05	7.55388e-06	3.73932e-06	9.03325e-08	-2.49093e-06	-3.33451e-07	1.25472e-06	1.70631e-06	9.04862e-07	-1.17004e-06	-4.6324e-06	-8.06993e-06	-7.01142e-06	-5.91297e-06	-3.09831e-06	1.55599e-06	3.95652e-06	3.69501e-06	2.93062e-06	2.09055e-06	-6.05175e-07	-2.64545e-06	-3.05325e-06	-1.81226e-06	-7.88647e-07
20	-1.24879e-06	-1.21409e-06	-1.50647e-06	-2.52318e-06	-2.48806e-06	-1.74585e-06	-2.97918e-06	-2.70925e-06	-1.27172e-06	-1.30232e-05	-2.51127e-05	-2.39975e-05	-1.96228e-05	-1.35003e-05	6.65776e-06	2.17113e-05	1.95336e-05	1.70572e-05	1.26267e-05	7.79537e-06	7.13707e-06	9.27729e-06	1.02134e-05	1.17922e-05	1.12649e-05	6.27512e-06	3.11259e-06	-1.96001e-07	-2.14879e-06	1.04085e-07	1.26452e-06	2.03291e-06	1.05519e-06	-8.79597e-07	-4.40523e-06	-7.76576e-06	-6.77243e-06	-6.0481e-06	-3.12851e-06	7.60826e-07	2.74758e-06	2.33215e-06	1.91613e-06	1.27159e-06	-9.54066e-07	-2.36602e-06	-2.60406e-06	-1.19082e-06	-4.77206e-07
21	-9.56272e-07	-6.16425e-07	-8.76848e-07	-1.73277e-06	-1.53531e-06	-9.4167e-07	-1.77449e-06	-2.89297e-07	9.37987e-07	-1.06152e-05	-1.95626e-05	-1.81245e-05	-1.44628e-05	-6.50808e-06	1.3276e-05	2.33848e-05	1.95754e-05	1.68746e-05	1.07001e-05	6.28939e-06	5.90839e-06	8.02131e-06	9.17381e-06	1.1058e-05	9.61415e-06	4.65597e-06	2.17363e-06	-7.82553e-07	-1.67036e-06	6.44907e-07	1.32387e-06	2.20359e-06	9.58324e-07	-9.35428e-07	-4.60085e-06	-7.29759e-06	-6.22676e-06	-5.80827e-06	-2.53619e-06	5.28112e-07	1.82417e-06	1.18413e-06	1.09081e-06	4.30646e-07	-1.39515e-06	-2.12844e-06	-1.99398e-06	-4.90595e-07	-1.18484e-07
22	-6.96678e-07	-1.95076e-07	-2.36821e-07	-1.04032e-06	-9.59495e-07	-5.42028e-07	-8.30748e-07	5.30889e-07	3.02254e-06	-6.21104e-06	-1.46262e-05	-1.45523e-05	-1.09934e-05	-3.76008e-06	1.34927e-05	2.31639e-05	1.94927e-05	1.62772e-05	9.67233e-06	5.37062e-06	4.53717e-06	6.53442e-06	8.007e-06	9.81051e-06	8.65766e-06	4.04299e-06	1.78109e-06	-5.40763e-07	-1.46235e-06	6.18165e-07	1.24883e-06	2.22856e-06	1.14504e-06	-6.62081e-07	-3.93327e-06	-6.75665e-06	-5.87452e-06	-5.65773e-06	-2.7096e-06	-1.1095e-07	1.06618e-06	5.28447e-07	5.00273e-07	1.63082e-07	-1.26763e-06	-1.73108e-06	-1.52833e-06	-2.00777e-07	2.81628e-07
23	-5.14029e-07	1.42871e-07	1.78765e-07	-5.54853e-07	-5.53759e-07	-3.32482e-07	-4.13102e-07	1.00567e-06	4.1659e-06	-3.64768e-06	-1.11465e-05	-1.16693e-05	-8.19849e-06	-1.43563e-06	1.37848e-05	2.21622e-05	1.85057e-05	1.49908e-05	8.14133e-06	4.3799e-06	3.42103e-06	5.37568e-06	6.94456e-06	8.67895e-06	7.49031e-06	3.25642e-06	1.35852e-06	-5.04967e-07	-1.25337e-06	6.03462e-07	1.15957e-06	2.23142e-06	1.11258e-06	-5.68135e-07	-3.63665e-06	-6.30181e-06	-5.45693e-06	-5.36801e-06	-2.55876e-06	-4.6499e-07	5.73529e-07	4.27764e-08	1.29021e-07	-4.98067e-08	-1.1563e-06	-1.37492e-06	-1.10178e-06	1.45465e-07	5.79962e-07
24	-4.73339e-07	1.33257e-07	5.63977e-07	-1.71437e-07	-1.84514e-07	-3.14377e-07	-1.96445e-07	4.89787e-07	4.20917e-06	-3.99675e-07	-7.35503e-06	-9.38926e-06	-6.74528e-06	-1.25753e-06	1.0897e-05	2.01848e-05	1.7992e-05	1.45013e-05	8.00125e-06	3.88373e-06	2.69738e-06	3.82947e-06	5.71886e-06	7.27029e-06	6.90056e-06	3.23387e-06	1.1036e-06	-1.88723e-07	-1.20247e-06	2.80117e-07	9.5245e-07	1.91588e-06	1.43267e-06	-3.31052e-07	-2.70279e-06	-5.6435e-06	-5.19093e-06	-5.03212e-06	-2.98375e-06	-8.2089e-07	8.06505e-08	-1.42838e-07	-2.62188e-07	-1.23759e-07	-9.5432e-07	-1.14209e-06	-7.92707e-07	1.29886e-07	9.70186e-07
25	-4.61278e-07	9.22579e-08	7.91823e-07	8.61369e-08	2.74529e-08	-3.52927e-07	-1.15097e-07	-4.10003e-08	4.03836e-06	2.21428e-06	-4.28294e-06	-7.58402e-06	-5.75612e-06	-1.5825e-06	7.77863e-06	1.79058e-05	1.71716e-05	1.3707e-05	7.85954e-06	3.59767e-06	2.10297e-06	2.55091e-06	4.65363e-06	6.00336e-06	6.36854e-06	3.2902e-06	9.43735e-07	7.46433e-08	-1.18303e-06	-4.49856e-08	7.57346e-07	1.56455e-06	1.62282e-06	-1.45851e-07	-1.95186e-06	-4.99284e-06	-4.90426e-06	-4.70559e-06	-3.33075e-06	-1.12687e-06	-2.82007e-07	-2.32941e-07	-5.16783e-07	-1.34372e-07	-7.25531e-07	-9.16203e-07	-5.28982e-07	1.22304e-07	1.24828e-06
26	-3.92448e-07	2.71326e-07	8.08631e-07	1.08587e-07	1.07548e-07	-3.77155e-07	-1.5643e-07	1.41264e-07	4.23961e-06	1.987e-06	-3.05029e-06	-5.90139e-06	-4.04235e-06	7.88193e-08	8.51901e-06	1.63808e-05	1.5068e-05	1.17428e-05	5.79204e-06	2.91244e-06	1.49105e-06	2.0815e-06	4.04177e-06	5.32516e-06	5.20281e-06	2.40008e-06	5.44701e-07	-1.96797e-07	-1.10568e-06	4.25268e-08	6.83572e-07	1.50091e-06	1.222e-06	-3.60236e-07	-2.30119e-06	-4.7664e-06	-4.33747e-06	-4.34304e-06	-2.71097e-06	-1.1019e-06	-3.60238e-07	-4.95686e-07	-5.7394e-07	-2.61796e-07	-7.28762e-07	-6.98179e-07	-2.01103e-07	5.04434e-07	1.42864e-06
27	-3.25504e-07	4.03527e-07	7.11814e-07	7.06379e-08	6.94826e-08	-4.01037e-07	-1.9636e-07	4.04043e-07	4.1877e-06	1.67197e-06	-2.3348e-06	-4.44865e-06	-2.49555e-06	1.49477e-06	8.98385e-06	1.48027e-05	1.30061e-05	9.63832e-06	4.10769e-06	2.29352e-06	1.01839e-06	1.787e-06	3.54428e-06	4.68319e-06	4.13751e-06	1.62364e-06	1.94602e-07	-4.47985e-07	-1.00804e-06	8.3718e-08	6.47413e-07	1.40014e-06	7.69346e-07	-6.52162e-07	-2.6523e-06	-4.51287e-06	-3.83232e-06	-3.8983e-06	-2.1511e-06	-1.03818e-06	-4.36406e-07	-6.79519e-07	-5.99947e-07	-3.77987e-07	-7.20676e-07	-5.105e-07	8.17817e-08	8.91455e-07	1.51209e-06
28	-2.74903e-07	5.30442e-07	4.88719e-07	3.00529e-09	-8.34732e-08	-4.23543e-07	-2.26176e-07	7.46763e-07	4.00209e-06	1.3394e-06	-1.81517e-06	-3.18574e-06	-1.30703e-06	2.5655e-06	9.07829e-06	1.30564e-05	1.10705e-05	7.47827e-06	2.76791e-06	1.92305e-06	5.73141e-07	1.62328e-06	3.12493e-06	4.1075e-06	3.14949e-06	1.0247e-06	-6.73866e-08	-6.81237e-07	-8.72995e-07	8.28095e-08	6.69175e-07	1.24445e-06	2.23293e-07	-9.0607e-07	-3.06337e-06	-4.14013e-06	-3.3437e-06	-3.49296e-06	-1.63027e-06	-1.07219e-06	-5.05091e-07	-8.24029e-07	-5.88464e-07	-4.95301e-07	-6.70448e-07	-3.27302e-07	3.48435e-07	1.28105e-06	1.46078e-06
29	-3.31629e-07	4.27665e-07	4.53179e-07	-1.80398e-07	-1.81103e-07	-5.06757e-07	-1.47747e-07	3.2486e-07	3.67638e-06	1.42134e-06	-6.72458e-07	-2.35528e-06	-8.42184e-07	2.4515e-06	7.75124e-06	1.13695e-05	9.72683e-06	6.65424e-06	1.91644e-06	1.7994e-06	3.71345e-07	1.0077e-06	2.55823e-06	3.49799e-06	2.67193e-06	8.51583e-07	-2.12736e-07	-7.1232e-07	-1.01043e-06	-7.38211e-09	5.88923e-07	9.86901e-07	6.80879e-08	-9.26521e-07	-2.98979e-06	-3.91342e-06	-2.92935e-06	-3.22877e-06	-1.51357e-06	-1.18607e-06	-5.88676e-07	-9.32783e-07	-7.1358e-07	-5.37971e-07	-7.06117e-07	-3.37768e-07	4.57823e-07	1.30477e-06	1.74446e-06
30	-3.2037e-07	1.47349e-07	4.01925e-07	-2.38777e-07	-1.5724e-07	-4.24923e-07	-6.25179e-08	-2.1484e-07	2.31894e-06	1.46674e-06	3.56677e-07	-1.47657e-06	-6.83294e-07	1.26398e-06	4.37694e-06	7.55141e-06	6.97577e-06	5.12398e-06	1.43245e-06	1.32829e-06	3.54091e-07	2.29156e-07	1.5478e-06	2.23827e-06	1.98958e-06	7.88725e-07	-1.63517e-07	-4.53289e-07	-8.94778e-07	-1.32861e-07	3.37728e-07	5.48576e-07	1.95672e-07	-6.27976e-07	-1.91057e-06	-2.83147e-06	-2.09992e-06	-2.27183e-06	-1.3442e-06	-9.37478e-07	-5.37137e-07	-7.08221e-07	-6.60512e-07	-3.96929e-07	-5.67096e-07	-3.35758e-07	3.04787e-07	8.23864e-07	1.55493e-06
[truncated: 32 more columns]

## Sheet: S2Fig D bottom
channel	alpha_power
'Fp1'	-1.82374e-05
'AF7'	-7.52121e-06
'F7'	9.6878e-06
'Fp2'	-1.63552e-05
'AF8'	-1.11185e-06
'F8'	4.9961e-06
'F5'	-5.27763e-06
'F3'	-8.0513e-06
'F1'	-3.62111e-05
'Fz'	-2.08097e-05
'F2'	-3.01898e-05
'F4'	-7.37486e-06
'F6'	-4.36853e-07
'AF4'	-1.60212e-05
'AF3'	-1.84761e-05
'FT7'	5.55911e-06
'FC5'	1.60963e-05
'FC3'	-6.41543e-06
'FC1'	8.94053e-06
'FCz'	-4.15909e-05
'FC2'	-4.0695e-06
'FC4'	-3.53023e-06
'FC6'	-5.00915e-06
'FT8'	4.29873e-06
'T8'	-1.57958e-05
'C6'	5.70612e-06
'C4'	5.92336e-06
'C2'	-3.24132e-05
'Cz'	-1.50826e-05
'C1'	-1.28037e-05
'C3'	-6.86033e-06
'C5'	-4.81224e-06
'T7'	-2.09774e-05
'TP9'	-1.37791e-05
'TP7'	-7.12364e-06
'CP5'	-4.14818e-06
'CP3'	3.33889e-06
'CP1'	-1.94817e-05
'CPz'	-4.89635e-05
'CP2'	-2.74965e-05
'CP4'	-1.39598e-05
'CP6'	5.45099e-06
'TP8'	8.23834e-06
'TP10'	-1.75656e-05
'P8'	-3.3947e-06
'P6'	-2.26236e-05
'P4'	-5.59153e-05
'P2'	-7.5986e-05
'Pz'	-7.70115e-05
'P1'	-2.47328e-05
'P3'	-1.82364e-05
'P5'	3.40666e-05
'P7'	6.35672e-06
'PO8'	-4.00699e-06
'PO4'	-8.14471e-06
'POz'	-2.98076e-05
'PO3'	9.63218e-06
'PO7'	1.47567e-05
'O1'	1.81223e-05
'Oz'	2.96066e-05
'O2'	2.98412e-05
